# Supplementary material for: Age-Related Differences in the Gastrointestinal Microbiota of Chinstrap Penguins (Pygoscelis antarctica)
Source: PubMed Central journal article supplement (PMC4824521; doi:10.1371/journal.pone.0153215), 2016-04-07
Supplement: pone.0153215.s001.pdf [file pone.0153215.s001.pdf]

**S1 Table. The most abundant genera in the cloacal microbiota of Chinstrap penguins.**

| <b>Phylum</b>          | <b>Genus</b>                    | <b>Reads</b> |
|------------------------|---------------------------------|--------------|
| <b>Firmicutes</b>      | <i>Incertae,Sedis</i>           | 284278       |
|                        | <i>Alkaliphilus</i>             | 44044        |
|                        | <i>Anaerotruncus</i>            | 37049        |
|                        | <i>Clostridium</i>              | 31089        |
|                        | <i>Finegoldia</i>               | 20651        |
|                        | <i>Leuconostoc</i>              | 20602        |
|                        | <i>Fastidiosipila</i>           | 13524        |
|                        | <i>Peptoniphilus</i>            | 12057        |
|                        | <i>Peptoniphilus</i>            | 12057        |
|                        | <i>Erysipelothrix</i>           | 11559        |
|                        | <i>Sporosarcina</i>             | 9288         |
|                        | <i>Gallicola</i>                | 7681         |
|                        | <i>Dialister</i>                | 7025         |
|                        | <i>Tissierella</i>              | 5836         |
|                        | <i>Lactococcus</i>              | 4335         |
|                        | <i>Helcococcus</i>              | 3297         |
|                        | <i>Candidatus,Arthromitus</i>   | 2931         |
|                        | <i>Filifactor</i>               | 2797         |
|                        | <i>Negativicoccus</i>           | 2724         |
|                        | <i>Guggenheimella</i>           | 2361         |
|                        | <i>Sarcina</i>                  | 2044         |
|                        | <i>Staphylococcus</i>           | 2025         |
| <i>Peptococcus</i>     | 1799                            |              |
| <i>Tepidimicrobium</i> | 1623                            |              |
| <i>Carnobacterium</i>  | 1425                            |              |
| <i>Murdochiella</i>    | 1030                            |              |
| <b>Fusobacteria</b>    | <i>Fusobacterium</i>            | 65457        |
|                        | <i>Cetobacterium</i>            | 25659        |
| <b>Bacteroidetes</b>   | <i>Flavobacterium</i>           | 82660        |
|                        | <i>Petrimonas</i>               | 65457        |
|                        | <i>Porphyromonas</i>            | 26435        |
|                        | <i>Proteiniphilum</i>           | 7441         |
|                        | Blvii28,wastewater-sludge,group | 7241         |
|                        | <i>Dysgonomonas</i>             | 5998         |
|                        | <i>Ornithobacterium</i>         | 4369         |
|                        | <i>Paludibacter</i>             | 4276         |
|                        | <i>Gelidibacter</i>             | 1481         |
| <b>Proteobacteria</b>  | <i>Campylobacter</i>            | 14932        |
|                        | <i>Chelonobacter</i>            | 14001        |
|                        | <i>Snodgrassella</i>            | 11600        |
|                        | <i>Escherichia-Shigella</i>     | 3828         |
|                        | <i>Pseudomonas</i>              | 3227         |
|                        | <i>Psychrobacter</i>            | 2609         |
|                        | <i>Helicobacter</i>             | 1443         |
|                        | <i>Sutterella</i>               | 1263         |

|                       |                        |       |
|-----------------------|------------------------|-------|
|                       | <i>Cardiobacterium</i> | 1071  |
| <b>Actinobacteria</b> | <i>Corynebacterium</i> | 11848 |
|                       | <i>Actinomyces</i>     | 10853 |
|                       | <i>Georgenia</i>       | 1744  |
