# Supplementary material for: Age-Related Differences in the Gastrointestinal Microbiota of Chinstrap Penguins (Pygoscelis antarctica)
Source: PubMed Central journal article supplement (PMC4824521; doi:10.1371/journal.pone.0153215), 2016-04-07
Supplement: pone.0153215.s002.pdf [file pone.0153215.s002.pdf]

1 **S2 Table. Taxa responsible for the largest contribution (in %) to the dissimilarity between adults and chicks according to SIMPER**  
 2 **analysis. Blue indicates OTUs that were more abundant in chicks and green in adults.**  
 3

| OTU  | Reads  | Samples <sup>a</sup> | Average abundance |        | Contribution % | Taxonomy           |                        |                |                                         |
|------|--------|----------------------|-------------------|--------|----------------|--------------------|------------------------|----------------|-----------------------------------------|
|      |        |                      | Adults            | Chicks |                |                    |                        |                |                                         |
| 3116 | 156701 | 45                   | 4.73              | 64.20  | 2.99           | Clostridiales      | Peptostreptococcaceae  | Incertae,Sedis | uncultured,bacterium                    |
| 1114 | 61449  | 44                   | 5.45              | 33.70  | 1.4            | Fusobacteriales    | Fusobacteriaceae       | Fusobacterium  | Fusobacterium,sp.,RMA,1065              |
| 3567 | 29107  | 24                   | 0.40              | 24.17  | 1.15           | Clostridiales      | Lachnospiraceae        | Incertae,Sedis | uncultured,bacterium                    |
| 258  | 35112  | 16                   | 0.35              | 16.24  | 0.75           | Clostridiales      | Ruminococcaceae        | Anaerotruncus  | uncultured,bacterium                    |
| 3709 | 10585  | 23                   | 0.33              | 15.68  | 0.75           | Clostridiales      | Lachnospiraceae        | Incertae,Sedis | Clostridium,colinum                     |
| 243  | 14001  | 45                   | 6.02              | 14.99  | 0.66           | Clostridiales      | Ruminococcaceae        | Fastidiosipila | Clostridiales,genom.,BVAB3,str.,UPII9-5 |
| 2605 | 19763  | 34                   | 11.95             | 12.94  | 0.71           | Lactobacillales    | Leuconostocaceae       | Leuconostoc    | uncultured,bacterium                    |
| 3720 | 18388  | 14                   | 0.22              | 12.70  | 0.62           | Clostridiales      | Lachnospiraceae        | Incertae,Sedis | Clostridium,colinum                     |
| 947  | 36881  | 42                   | 26.50             | 10.71  | 1.15           | Clostridiales      | Family,XI,Incert Sedis | Incertae,Sedis | uncultured,bacterium                    |
| 3457 | 50361  | 35                   | 30.18             | 8.78   | 1.49           | Bacteroidales      | Porphyromonadaceae     | Petrimonas     | uncultured,bacterium                    |
| 3276 | 24361  | 39                   | 9.48              | 7.15   | 0.66           | Fusobacteriales    | Fusobacteriaceae       | Cetobacterium  | uncultured,bacterium                    |
| 2004 | 25420  | 34                   | 25.95             | 5.33   | 1.17           | Bacteroidales      | Porphyromonadaceae     | Petrimonas     | uncultured,bacterium                    |
| 1248 | 43765  | 34                   | 32.86             | 5.06   | 1.44           | Clostridiales      | Clostridiaceae         | Alkaliphilus   | uncultured,bacterium                    |
| 2547 | 12019  | 29                   | 15.64             | 2.10   | 0.78           | Bacteroidales      | Porphyromonadaceae     | Porphyromonas  | Porphyromonas,sp..2018                  |
| 3587 | 9236   | 32                   | 14.95             | 2.03   | 0.67           | Bacteroidales      | Porphyromonadaceae     | Porphyromonas  | Porphyromonas,gingivalis,ATCC,33277     |
| 734  | 14525  | 32                   | 20.68             | 1.85   | 0.91           | Campylobacteriales | Campylobacteraceae     | Campylobacter  | uncultured,bacterium                    |
| 2964 | 11442  | 29                   | 16.73             | 0.23   | 0.79           | Neisseriales       | Neisseriaceae          | Snodgrassella  | Snodgrassella,alvi                      |
| 2425 | 10262  | 28                   | 16.66             | 0.22   | 0.77           | Neisseriales       |                        | SC-I-84        | uncultured,proteobacterium              |
| 2467 | 19988  | 27                   | 22.31             | 0.21   | 1.06           | Clostridiales      | Family,XI,Incert Sedis | Finegoldia     | uncultured,bacterium                    |
| 2858 | 5878   | 27                   | 12.60             | 0.09   | 0.58           | Candidate,div SR1  |                        |                | uncultured,bacterium                    |

4 <sup>a</sup> Number of samples in which the OTU appeared.  
 5  
 6
